# Supplementary material for: A live-attenuated pneumococcal vaccine elicits CD4+ T-cell dependent class switching and provides serotype independent protection against acute otitis media
Source: PubMed Central journal article supplement (PMC3936495; doi:10.1002/emmm.201202150), 2013-11-04

**Figure S2. Luminescent intensity in the ears and sinuses at 24 and 72 hours post infection for the various vaccine conditions. Quantitation is as described in Figure 4.**

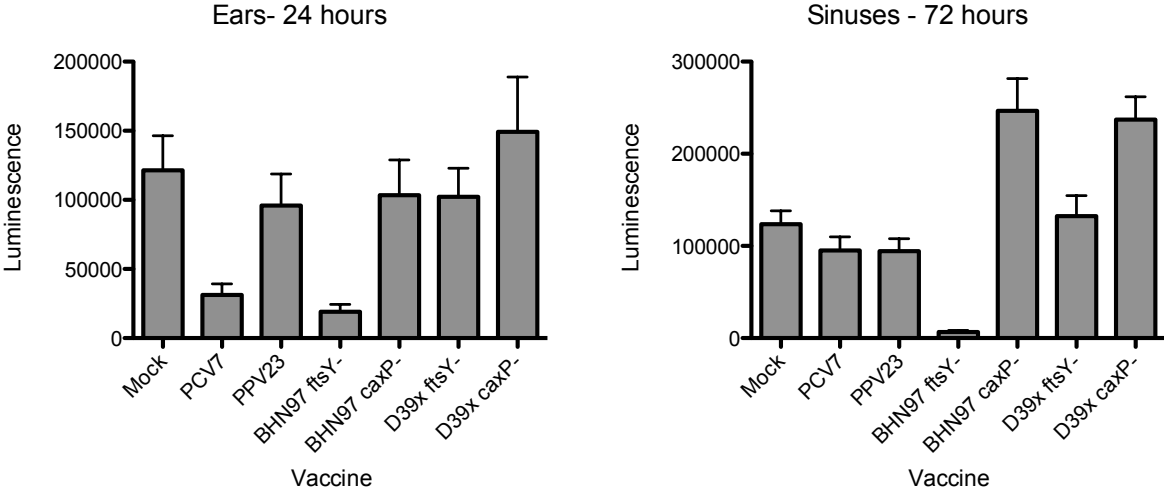

Supplement: emmm0006-0141-sd3.pdf [file emmm0006-0141-sd3.pdf]
