# Supplementary material for: A live-attenuated pneumococcal vaccine elicits CD4+ T-cell dependent class switching and provides serotype independent protection against acute otitis media
Source: PubMed Central journal article supplement (PMC3936495; doi:10.1002/emmm.201202150), 2013-11-04

**Figure S3. The BHN97 ftsY vaccination induces significantly greater antibody titers than or intranasal heat killed BHN97.** Serum antibody titers against Pneumolysin, CbpA, and PspA were determined by ELISA using purified recombinant protein.

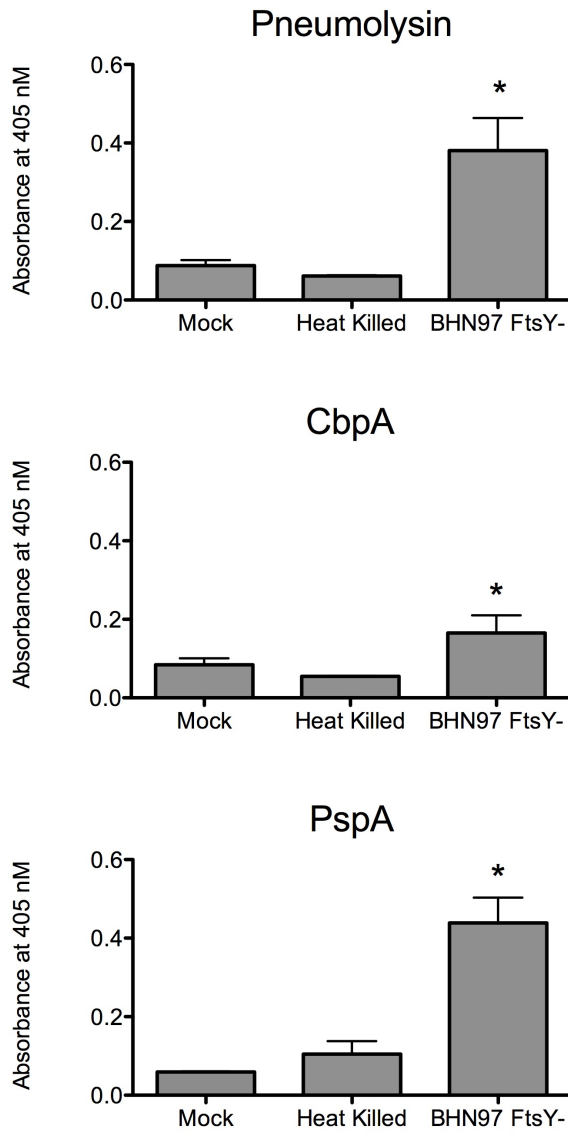

Supplement: emmm0006-0141-sd4.pdf [file emmm0006-0141-sd4.pdf]
