# Supplementary material for: A live-attenuated pneumococcal vaccine elicits CD4+ T-cell dependent class switching and provides serotype independent protection against acute otitis media
Source: PubMed Central journal article supplement (PMC3936495; doi:10.1002/emmm.201202150), 2013-11-04

**Figure S4. Live vaccine confers homologous and heterologous protection against colonization.** Bacterial loads in the nasal passages of BHN97 mice (day 7 post challenge) and the 6A4 strain (day 3 post challenge) as determined by nasal lavage and plating for colony forming units. Due to the lethality of the 6A challenge, the day 3 time point is shown due to the low survival of the mock animals at day 7. \*=  $p < 0.05$  by Mann-Whitney.

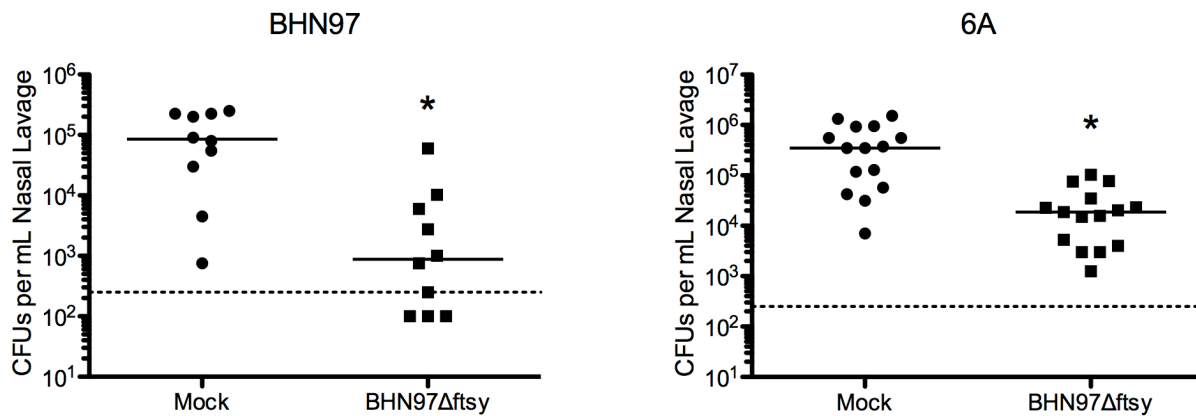

Supplement: emmm0006-0141-sd5.pdf [file emmm0006-0141-sd5.pdf]
