# Supplementary material for: A live-attenuated pneumococcal vaccine elicits CD4+ T-cell dependent class switching and provides serotype independent protection against acute otitis media
Source: PubMed Central journal article supplement (PMC3936495; doi:10.1002/emmm.201202150), 2013-11-04
Supplement: emmm0006-0141-sd6.pdf [file emmm0006-0141-sd6.pdf]

**Figure S5. Live vaccine confers greater heterologous antibody titers than prolonger colonization with parental strain.** Mice were either infected with a single dose of the BHN97 strain, resulting in colonization for over 4 weeks, or subjected to the BHN97  $\Delta$ ftsY vaccine regimen as described in the methods section. While both groups developed equivalent antibody titers against the parental 19F strain, the live vaccine resulted in significantly greater antibody titers against heterologous strains. \*=  $p < 0.05$  by Mann-Whitney.

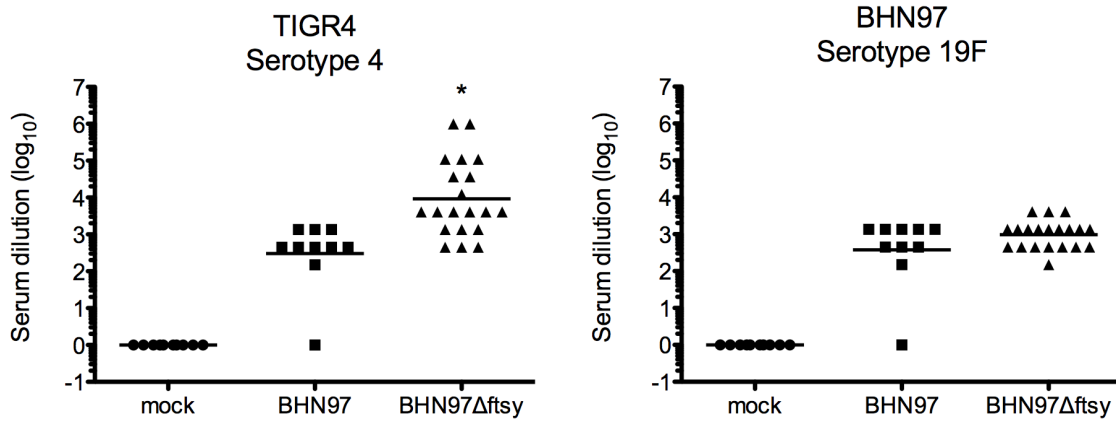

**Table S1. Primers used in this study.**

| Oligonucleotide | Sequence                                              |
|-----------------|-------------------------------------------------------|
| FTSY UP F       | CGACCATTATCTTGGTAAGGAAATGATCC                         |
| FTSY UP R       | GAGTCGCTTTTGTAAATTTGGTCAGAAGCAAAAATCCTGCAAGGCATAAAC   |
| FTSY DOWN F     | GTTTGCTTCTAAGTCTTATTTCTTAGTTCTCCTTTAGCACATATTCTTC     |
| FTSY DOWN R     | GGCTTTGAATCCATTGATATTGTTCTGG                          |
| CAXP UP F       | CGCATTCTTGTCAAAACCGAGTTTGCG                           |
| CAXP UP R       | GAGTCGCTTTTGTAAATTTGGGCCATGACAGGTGACGGTGTCAATGACGCGCC |
| CAXP DOWN F     | GTTTGCTTCTAAGTCTTATTTCCCGCATCTTGAAGCATACCAGCAATATGACC |
| CAXP DOWN R     | GGAGGAGACACATGTCAAAGAACAACAAAACGCCAAGCG               |
